# Supplementary material
Source: publisher figshare collection journal article supplement (https://acs.figshare.com/ndownloader/files/8648851)
Supplement: Supplementary file 1 [file 8648851]

## Supporting Information

# J-Type Hetero-Exciton Coupling Effect on an Asymmetric Donor–Acceptor–Donor-Type Fluorophore

*Yuichi Kitagawa<sup>†\*</sup>, Ryuto Yachi<sup>‡</sup>, Takayuki Nakanishi<sup>†</sup>, Koji Fushimi<sup>†</sup>, and Yasuchika Hasegawa<sup>†\*</sup>*

<sup>†</sup>Faculty of Engineering, Hokkaido University, Kita-13 Jo, Nishi-8 Chome, Kita-ku, Sapporo, Hokkaido, 060-8628, Japan. <sup>‡</sup>Graduate School of Chemical Sciences and Engineering, Hokkaido University, Kita-13 Jo, Nishi-8 Chome, Kita-ku, Sapporo, Hokkaido, 060-8628, Japan.

## Corresponding Author

\*E-mail: y-kitagawa@eng.hokudai.ac.jp

\*E-mail: hasegaway@eng.hokudai.ac.jp

## S1. Synthetic schemes

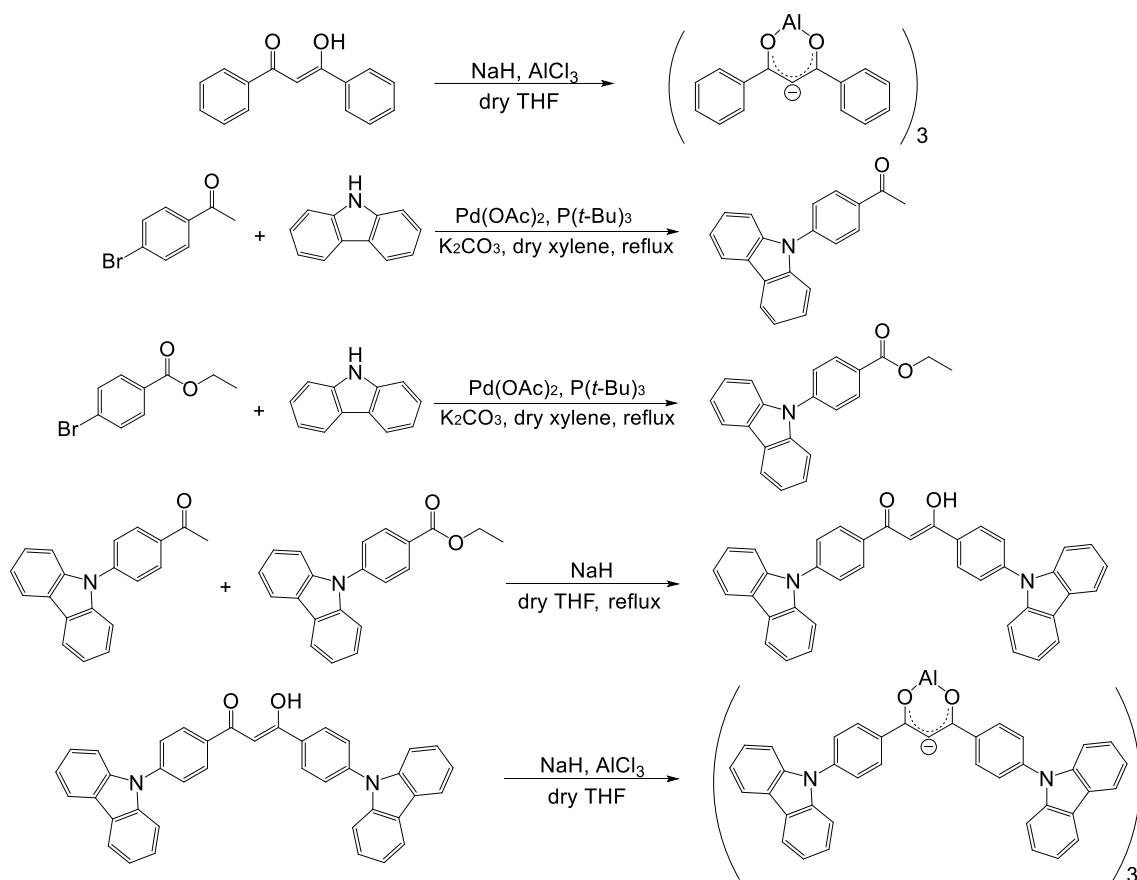

**Scheme S1.** Synthetic schemes.

## S2. Synthetic schemes and their identifications

### Carbazole (D)

$^1\text{H-NMR}$  (400 MHz,  $\text{DMSO-d}_6$ , TMS):  $\delta/\text{ppm} = 7.14\text{--}7.25$  (2H, m), 7.37–7.48 (2H, m), 7.49–7.57 (2H, m), 8.15 (2H, d,  $J = 8.0$  Hz), 11.3 (1H, s).

### Dibenzoylmethane (A)

$^1\text{H-NMR}$  (400 MHz,  $\text{CDCl}_3$ , TMS):  $\delta/\text{ppm} = 6.87$  (1H, s), 7.45–7.61 (6H, m), 7.96–8.04 (4H, m), 16.9 (1H, s).

### Tris(1,3-diphenyl-1,3-propanedionato)aluminium (III) ( $\text{Al(III)A}_3$ )

The  $\text{Al(III)A}_3$  was prepared according to previously reported procedures. A solution of THF, Super Dehydrated (70 mL) was added dropwise to a three-necked flask containing A (0.672 g, 3.00 mmol),  $\text{Al(III)Cl}_3$  (0.142 g, 1.05 mmol), NaH (0.147 g, 3.37 mmol), and subsequently stirred for 24 h at room temperature. The product was extracted with  $\text{CH}_2\text{Cl}_2$ , and the extracts were washed three times with distilled water and subsequently dried over anhydrous  $\text{MgSO}_4$ . The solvent was reprecipitated (hexane/ $\text{CH}_2\text{Cl}_2$ ), which results in a white solid compound.

$^1\text{H-NMR}$  (400 MHz,  $\text{CDCl}_3$ , TMS):  $\delta/\text{ppm} = 6.95$  (3H, s), 7.33–7.51 (18H, m), 7.98–8.09 (12H, m).

**S3.  $^1\text{H}$ -NMR spectrum of As-D-A-D in  $\text{CD}_2\text{Cl}_2$**

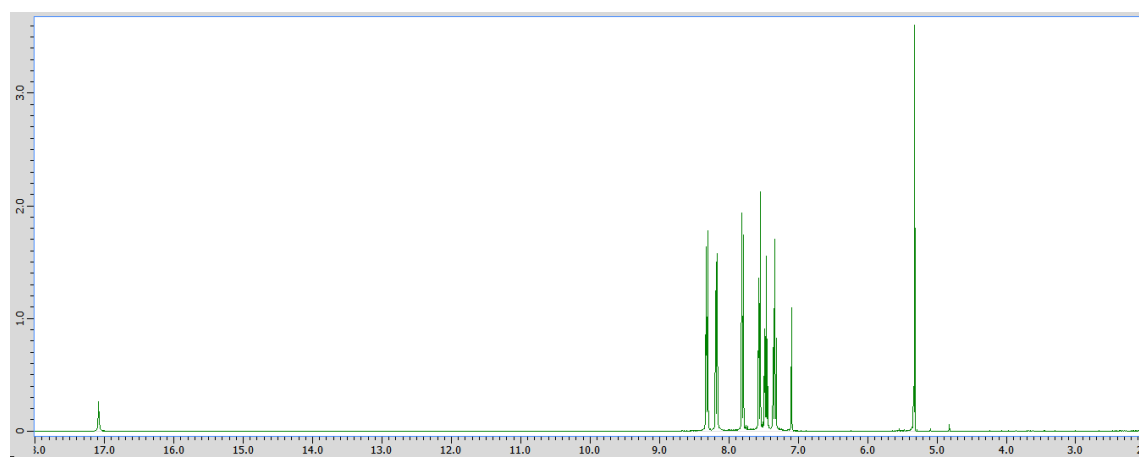

**Figure S1.**  $^1\text{H}$ -NMR spectrum for As-D-A-D in  $\text{CD}_2\text{Cl}_2$ .

#### S4. DFT calculations for As-D-A-D

The optimized structures (Figure S2) of keto and cis-enol forms were calculated by DFT (B3LYP/6-31G(D)). The total electron energy of the cis-enol form was lower than that of the keto form ( $\Delta E = 302 \text{ cm}^{-1}$ ).

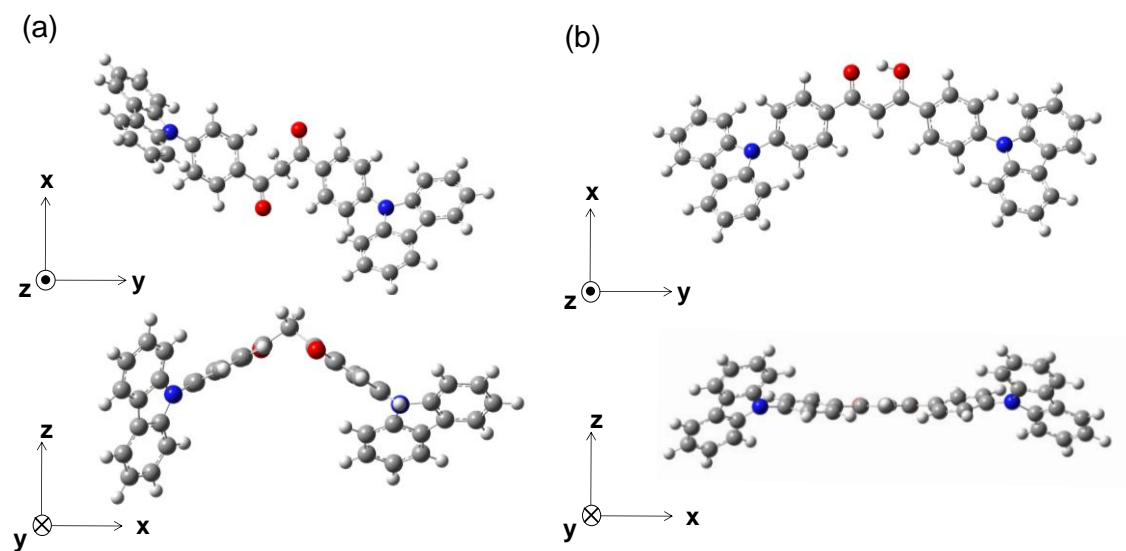

**Figure S2.** Optimized structures for the keto-form (a) and cis-enol-form (b).

**S5. Electronic absorption spectra of A and Al(III)A<sub>3</sub>**

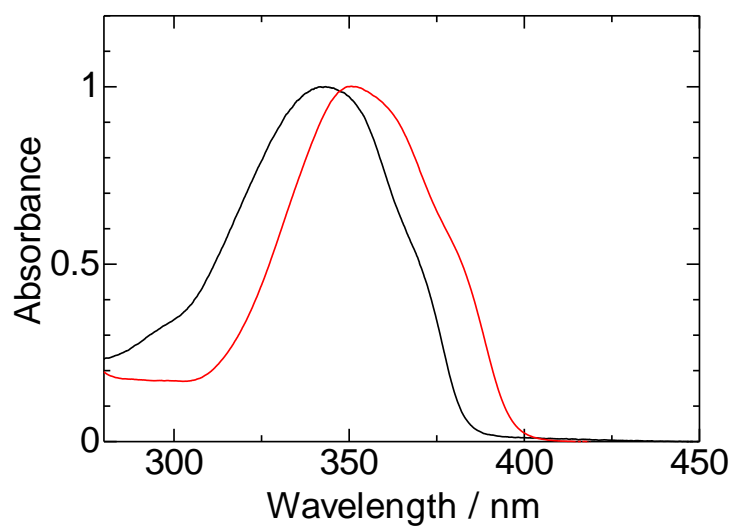

**Figure S3.** Electronic absorption spectra of A (black line) and Al(III)A<sub>3</sub> (red line).

## S6. DFT calculation for As–D–A–D in ground states

In order to clarify the ground state properties, TD-DFT calculations were performed. First, the optimum structure of As–D–A–D in its ground state was calculated by the DFT method (B3LYP/6-31G\*, Gaussian03). The optimum structure of As–D–A–D showed a low twisted angle (50.35° and 50.85°) between D and A moieties (Figure S2b). The molecular orbitals are shown in Figure S4. The low twist induces weak delocalization of the orbital between D and A moieties (HOMO and HOMO-1). An electronic absorption spectrum was calculated for the optimum structure of As–D–A–D using the TD-DFT (B3LYP/6-31G\*, Gaussian 03) method, and the obtained results can explain the experimental results (Table S1). The three characteristic intense absorption bands were calculated. The intense band at the longest wavelength side was originated from a HOMO → LUMO electronic configuration. The transition from the delocalized orbital between D and A moieties (HOMO) to the localized A orbital (LUMO) caused the observed broad absorption band with a weak CT character. This transition feature indicated that the exciton coupling between the excited states corresponding to the transitions from each donor to acceptor does not take place in the ground-state structure. The calculated second intense absorption band originated from HOMO-4 → LUMO electronic configuration, which was assigned to the localized excited states of the As–D–A–D moiety. The experimental broad bands of As–D–A–D and Sy–D–A–D were mainly composed of these transitions. The sharp intense bands of the compounds at around 290 nm mainly originated from HOMO-3 → LUMO+2 and HOMO-2 → LUMO+3, which were assigned to the localized excited states of the D moiety. In addition, the electronic absorption change behavior upon coordination of Al<sup>3+</sup> originated from the low electronegativity effect of Al<sup>3+</sup>, which is expected to induce an increase in the energy of the orbitals with

regard to the transition for the A moiety.

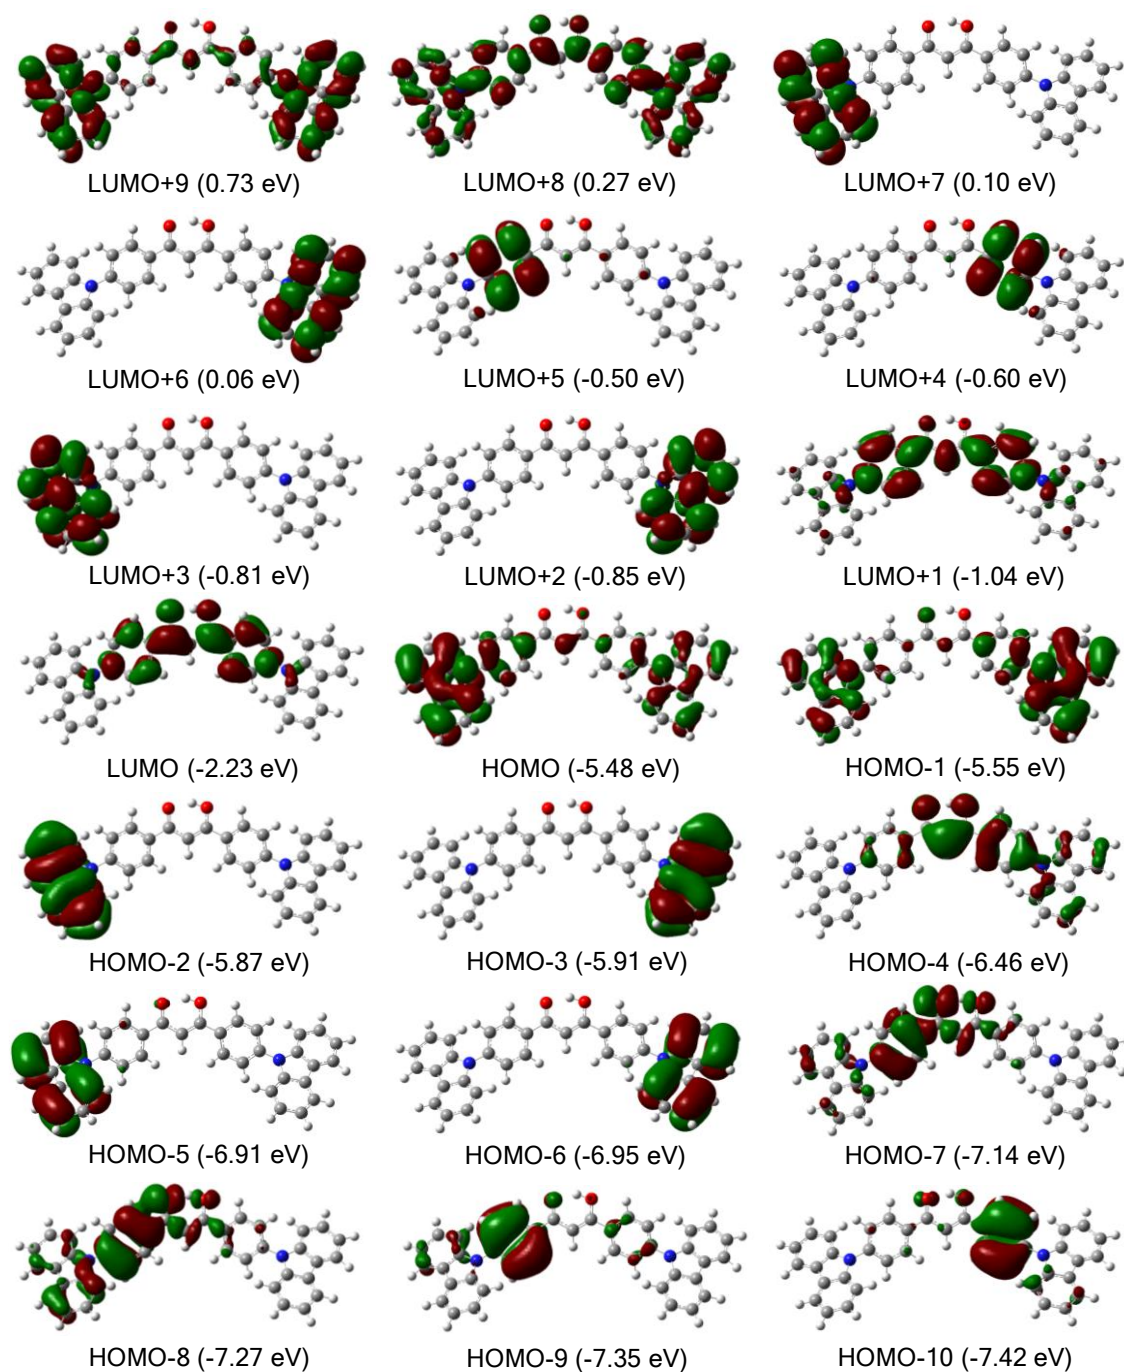

**Figure S4.** MOs for As-D-A-D in the ground state structure.



**Table S1.** Information about the main electronic configurations for As–D–A–D.

| Excited states  | $\lambda_{\text{em}} / \text{nm}$ | $f_{\text{osc}} / -$ | Main configurations                                                     |
|-----------------|-----------------------------------|----------------------|-------------------------------------------------------------------------|
| S <sub>1</sub>  | 437                               | 0.5788               | H→L (96 %)                                                              |
| S <sub>2</sub>  | 417                               | 0.0603               | H-1→L (97 %)                                                            |
| S <sub>3</sub>  | 379                               | 0.0001               | H-2→L (99 %)                                                            |
| S <sub>4</sub>  | 376                               | 0.0001               | H-3→L (99 %)                                                            |
| S <sub>5</sub>  | 333                               | 0.0013               | H-7→L (68 %), H-8→L (26 %)                                              |
| S <sub>6</sub>  | 321                               | 0.7345               | H-4→L (87 %), H→L+1 (5 %)                                               |
| S <sub>7</sub>  | 308                               | 0.0455               | H-4→L (5 %), H→L+1 (87 %)                                               |
| S <sub>8</sub>  | 306                               | 0.0075               | H-3→L+5 (5 %), H-1→L+2 (59 %), H→L+2 (27 %)                             |
| S <sub>9</sub>  | 306                               | 0.0163               | H-2→L+6 (5 %), H-1→L+3 (18 %), H→L+3 (67%)                              |
| S <sub>10</sub> | 304                               | 0.0208               | H-1→L+2 (89 %)                                                          |
| S <sub>11</sub> | 293                               | 0.0058               | H-10→L (8 %), H-1→L+4 (54 %), H→L+4 (28%)                               |
| S <sub>12</sub> | 291                               | 0.0004               | H-9→L (9 %), H-5→L (30 %), H-1→L+5 (9%), H→L+5 (42%)                    |
| S <sub>13</sub> | 287                               | 0.0008               | H-5→L (65 %), H-1→L+5 (5 %), H-7→L (22 %)                               |
| S <sub>14</sub> | 286                               | 0.0013               | H-6→L (93 %)                                                            |
| S <sub>15</sub> | 281                               | 0.0001               | H-2→L+1 (95 %)                                                          |
| S <sub>16</sub> | 278                               | 0.0001               | H-1→L+2 (31 %), H→L+2 (69 %)                                            |
| S <sub>17</sub> | 277                               | 0.0005               | H-3→L+1 (94 %)                                                          |
| S <sub>18</sub> | 274                               | 0.0000               | H-1→L+3 (78 %), H→L+3 (21 %)                                            |
| S <sub>19</sub> | 273                               | 0.0271               | H-9→L (37 %), H-8→L (27 %), H-7→L (11 %),<br>H-1→L+3 (7 %), H→L+5 (9 %) |
| S <sub>20</sub> | 271                               | 0.0295               | H-3→L+2 (25 %), H-2→L+3 (38 %), H-1→L+6 (7 %),<br>H→L+7(13 %)           |
| S <sub>21</sub> | 271                               | 0.1386               | H-3→L+2 (38 %), H-2→L+3 (24 %), H-1→L+6 (12 %),<br>H→L+7(8 %)           |
| S <sub>22</sub> | 269                               | 0.0134               | H-10→L (34 %), H-1→L+4 (34 %), H→L+4 (20 %)                             |
| S <sub>23</sub> | 267                               | 0.0155               | H-10→L (41 %), H→L+4 (48 %)                                             |
| S <sub>24</sub> | 265                               | 0.0861               | H-9→L (42 %), H-8→L (37 %), H-7→L (13 %)                                |
| S <sub>25</sub> | 262                               | 0.0050               | H-1→L+5 (75 %), H→L+5 (20 %)                                            |

**S7. Fluorescence spectra of A, D, Al(III)A<sub>3</sub>, As-D-A-D, and Sy-D-A-D**

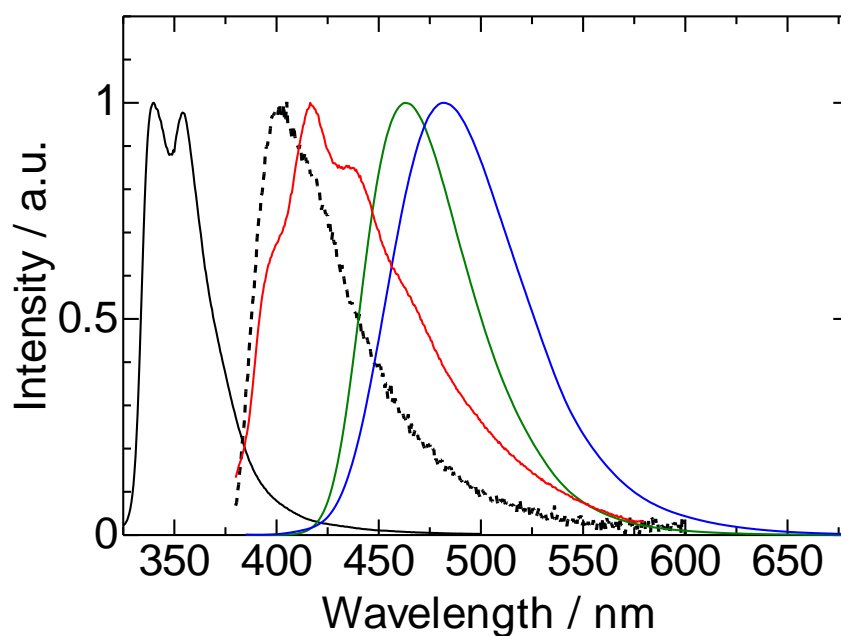

**Figure S5.** Fluorescence spectra of A (broken line,  $\lambda_{\text{ex}} = 350$  nm), D (black line,  $\lambda_{\text{ex}} = 295$  nm), Al(III)A<sub>3</sub> (red line,  $\lambda_{\text{ex}} = 350$  nm), As-D-A-D (blue line,  $\lambda_{\text{ex}} = 370$  nm), and Sy-D-A-D (green line,  $\lambda_{\text{ex}} = 370$  nm) in CHCl<sub>3</sub>.

### **S8. TD-DFT calculation for As–D–A–D in the excited state**

In order to clarify the excited state properties, TD-DFT calculations were performed. First, the optimum structure of As–D–A–D in its  $S_1$  state was calculated by the DFT method (B3LYP/6-31G\*, Gaussian03). The optimum structure of As–D–A–D showed twisted angles ( $89.97^\circ$  and  $69.16^\circ$ ) between D and A moieties (Figure 4a). The molecular orbitals and the electronic configurations are shown in Figure S6 and Table S2, respectively.

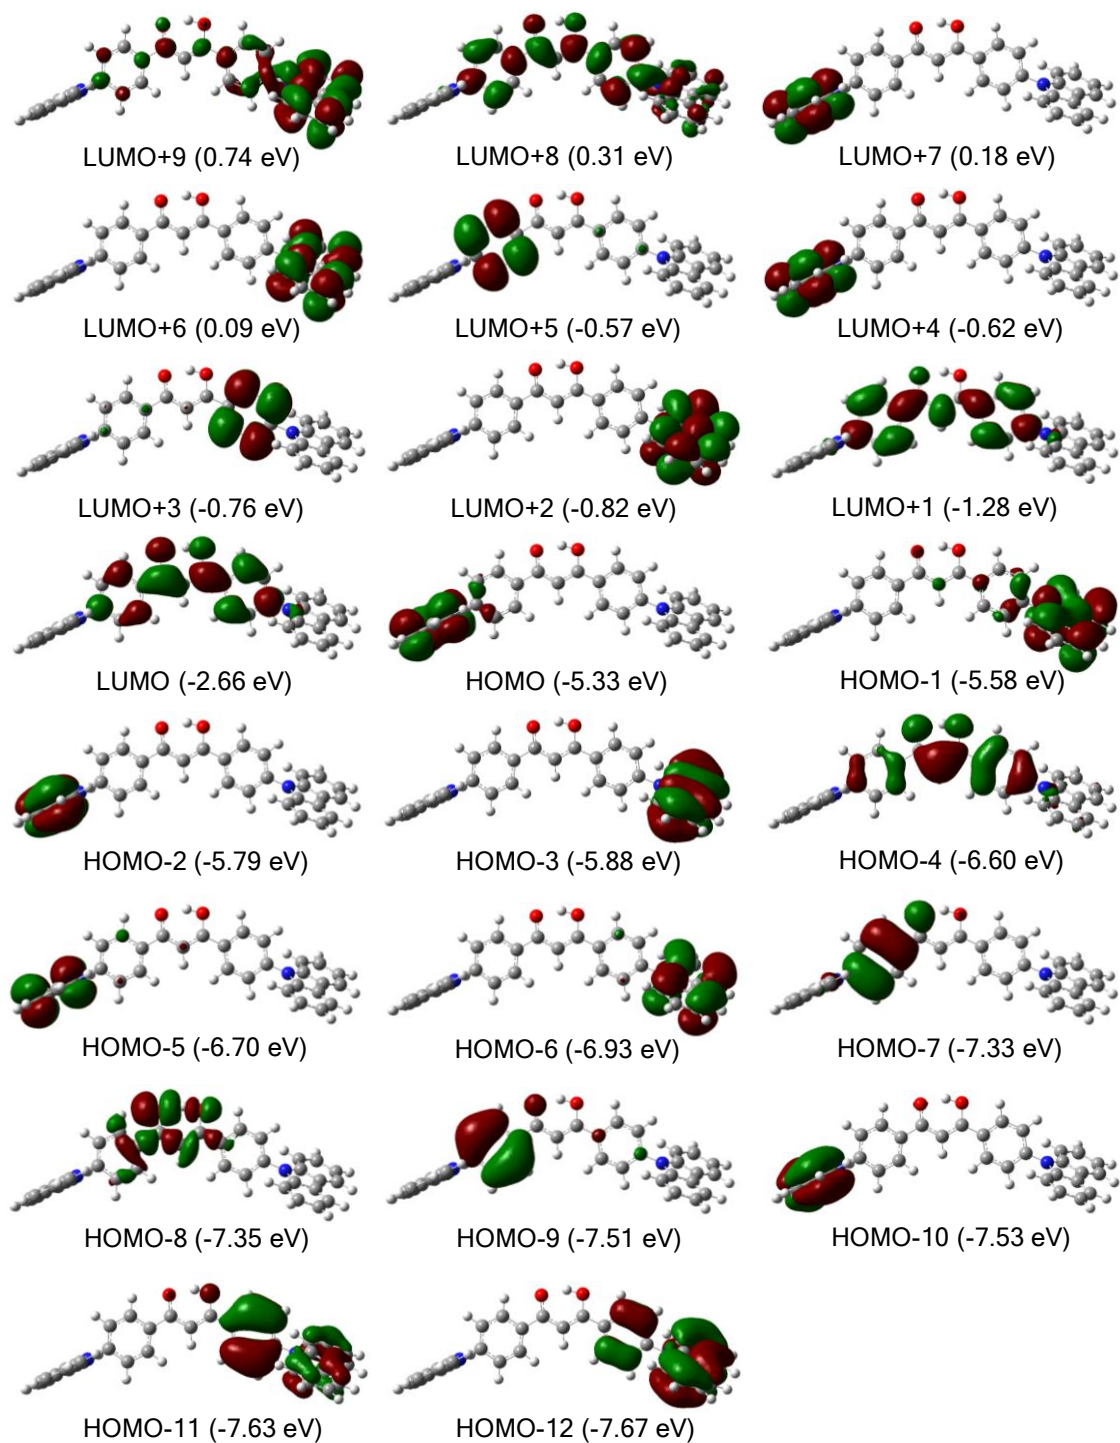

**Figure S6.** MOs for As-D-A-D in the excited state structure.

**Table S2.** Information about the main electronic configurations for As–D–A–D.

| Excited states  | $\lambda_{\text{em}} / \text{nm}$ | $f_{\text{osc}} / -$ | Main configurations                                           |
|-----------------|-----------------------------------|----------------------|---------------------------------------------------------------|
| S <sub>1</sub>  | 548                               | 0.0000               | H→L (98 %)                                                    |
| S <sub>2</sub>  | 497                               | 0.1220               | H-1→L (99 %)                                                  |
| S <sub>3</sub>  | 446                               | 0.0000               | H-2→L (99 %)                                                  |
| S <sub>4</sub>  | 440                               | 0.0000               | H-3→L (99 %)                                                  |
| S <sub>5</sub>  | 356                               | 0.0000               | H-8→L (97 %)                                                  |
| S <sub>6</sub>  | 351                               | 0.0000               | H→L+1 (97 %)                                                  |
| S <sub>7</sub>  | 343                               | 1.0687               | H-4→L (96 %)                                                  |
| S <sub>8</sub>  | 337                               | 0.0252               | H-5→L (99 %)                                                  |
| S <sub>9</sub>  | 321                               | 0.0019               | H-6→L (97 %)                                                  |
| S <sub>10</sub> | 320                               | 0.0025               | H-1→L+1 (95 %)                                                |
| S <sub>11</sub> | 305                               | 0.0268               | H-2→L+1 (5 %), H-2→L+7 (6 %), H→L+4 (87%)                     |
| S <sub>12</sub> | 304                               | 0.0019               | H-2→L+1 (93 %)                                                |
| S <sub>13</sub> | 303                               | 0.0002               | H→L+5 (99 %)                                                  |
| S <sub>14</sub> | 301                               | 0.0249               | H-3→L+6 (7 %), H-1→L+2 (89 %)                                 |
| S <sub>15</sub> | 299                               | 0.0015               | H-11→L (5 %), H-1→L+3 (89 %)                                  |
| S <sub>16</sub> | 295                               | 0.0238               | H-9→L (37 %), H-7→L (59 %)                                    |
| S <sub>17</sub> | 294                               | 0.0002               | H-3→L+1 (98 %)                                                |
| S <sub>18</sub> | 287                               | 0.0000               | H→L+2 (15 %), H→L+3 (84 %)                                    |
| S <sub>19</sub> | 287                               | 0.0000               | H→L+2 (85 %), H-8→L (15 %)                                    |
| S <sub>20</sub> | 282                               | 0.0428               | H-12→L (13 %), H-11→L (65 %), H-4→L+3 (6 %),<br>H-1→L+3 (6 %) |
| S <sub>21</sub> | 282                               | 0.1386               | H-9→L (54 %), H-7→L+3 (24 %)                                  |
| S <sub>22</sub> | 275                               | 0.0000               | H-10→L (99 %)                                                 |
| S <sub>23</sub> | 271                               | 0.0117               | H-3→L+2 (10 %), H-3→L+3 (86 %)                                |
| S <sub>24</sub> | 271                               | 0.0319               | H-3→L+4 (60 %), H→L+7 (35 %)                                  |
| S <sub>25</sub> | 270                               | 0.1018               | H-3→L+2 (61 %), H-3→L+3 (11 %), H-1→L+6 (21 %)                |

### S9. TD-DFT calculation for As–D–A–D in the excited state using the other basis set

The optimum structure of As–D–A–D in its  $S_1$  state was calculated using DFT (B3LYP/6-31G\*\*). The optimum structure of As–D–A–D (Figure S7) is similar to the results obtained using the B3LYP/6-31G\* basis set. Although it is difficult to determine the exact structure of As–D–A–D, the existence of the undegenerated occupied orbitals (HOMO and HOMO-1) inducing CT hetero-excitons can be confirmed.

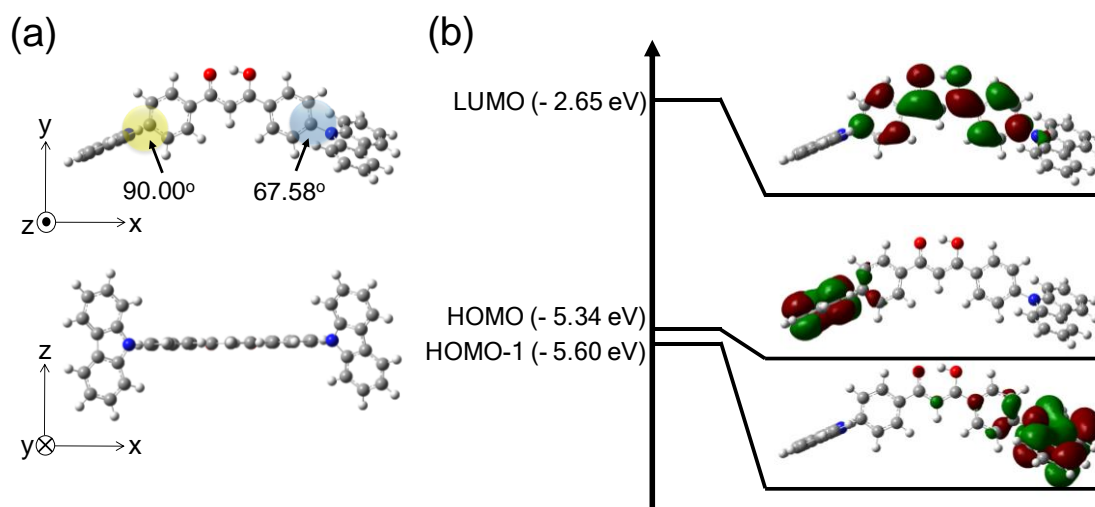

**Figure S7.** Optimized structure (a) and the molecular orbitals (b, LUMO, HOMO, HOMO-1) for As–D–A–D (B3LYP/6-31G\*\*).

## S10. Stokes shifts

**Table S3.** Stokes shifts estimated by absorption and fluorescence maxima

|          | Solvent                         | $\lambda_{\text{abs}} / \text{cm}^{-1}$ | $\lambda_{\text{em}} / \text{cm}^{-1}$ | Stokes shift / $\text{cm}^{-1}$ | $\Delta f$ |
|----------|---------------------------------|-----------------------------------------|----------------------------------------|---------------------------------|------------|
| As-D-A-D | Cyclohexane                     | 25,840                                  | 23,870                                 | 1970                            | -0.004     |
| As-D-A-D | Hexane                          | 25,970                                  | 23,980                                 | 1990                            | 0.001      |
| As-D-A-D | Toluene                         | 25,510                                  | 22,730                                 | 2780                            | 0.014      |
| As-D-A-D | CHCl <sub>3</sub>               | 25,580                                  | 20,750                                 | 4830                            | 0.150      |
| As-D-A-D | CH <sub>2</sub> Cl <sub>2</sub> | 25,640                                  | 20,000                                 | 5640                            | 0.220      |
| Sy-D-A-D | Toluene                         | 24,940                                  | 22,370                                 | 2570                            | 0.014      |
| Sy-D-A-D | CHCl <sub>3</sub>               | 25,320                                  | 21,600                                 | 3720                            | 0.150      |
| Sy-D-A-D | CH <sub>2</sub> Cl <sub>2</sub> | 25,250                                  | 20,530                                 | 4720                            | 0.220      |

### S11. Hydrogenated solvent effect for As-D-A-D

We also consider the presence or absence of the ESIPT pathway from the observed luminescence state for As-D-A-D. The intermolecular interaction between As-D-A-D and halogenated solvents ( $\text{CHCl}_3$  and  $\text{CH}_2\text{Cl}_2$ ) is larger than that between As-D-A-D and other solvents (cyclohexane, hexane, and toluene). The stronger interaction might weaken its intramolecular hydrogen bond, which may decrease the rate constant of ESIPT. Therefore, we checked the photophysical properties of As-D-A-D in  $\text{CCl}_4$  with relatively small  $\Delta f$  ( $= 0.007$ ). The absorption and luminescence spectra of As-D-A-D in  $\text{CCl}_4$  are shown in Figure S8. The absorption and luminescence band peaks are  $25610$  and  $23250\text{ cm}^{-1}$ , respectively. The  $\phi_f$ ,  $k_r$ , and  $k_{nr}$  are  $4.4\%$ ,  $9.6 \times 10^6\text{ s}^{-1}$ , and  $2.1 \times 10^8\text{ s}^{-1}$ , respectively. In the solvents, including hydrogenated solvents, the  $k_{nr}$  values tend to decrease for As-D-A-D with an increase in  $\Delta f$ . In addition, the  $k_{nr}$  values of As-D-A-D and Sy-D-A-D were relatively close. Therefore, these facts suggest that the ESIPT doesn't occur from the observed luminescence states.

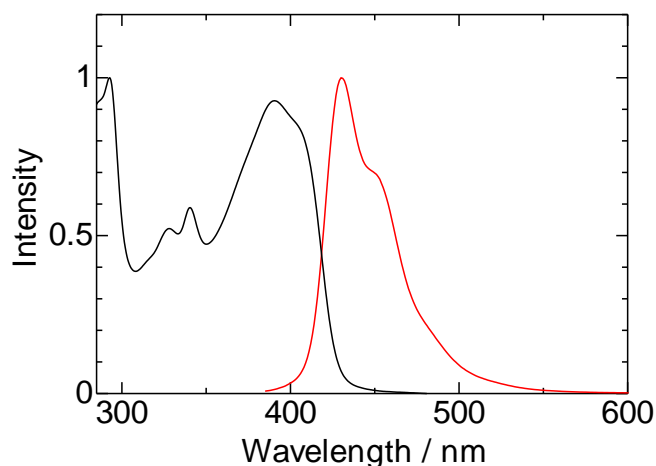

**Figure S8.** Electronic absorption and luminescence spectra of As-D-A-D in  $\text{CCl}_4$ . Normalized by intensity maxima.



**S12.** Conceptual diagram of the change of the twisted angles with increase in  $\Delta f$

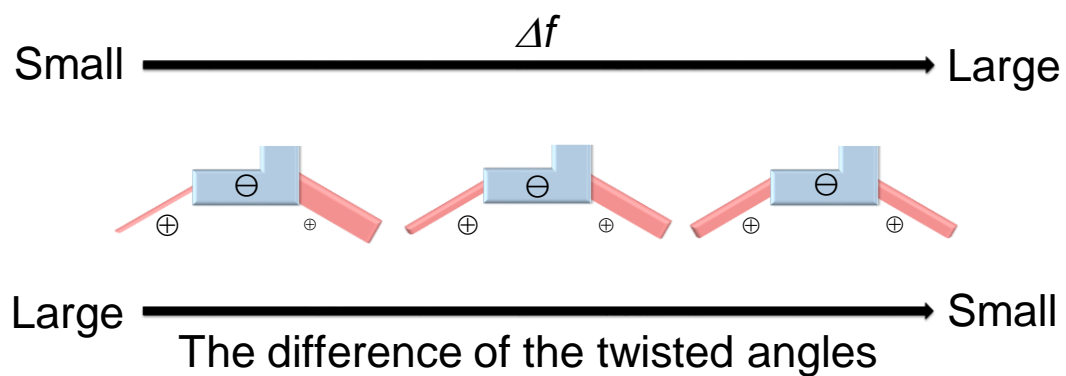

**Figure S9.** Conceptual diagram of the change of the twisted angles with increase in  $\Delta f$ .

**S13.** Organic compound with an inversion energy level between  $S_1$  and  $T_1$

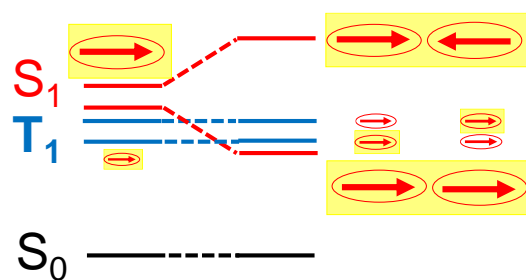

**Figure S10.** Organic compound with an inversion energy level between  $S_1$  and  $T_1$ .
